# Supplementary material for: Tenecteplase Versus Alteplase in Medium Vessel Occlusion Ischemic Stroke: A Secondary Analysis of the Alteplase Compared to Tenecteplase Randomized Trial
Source: PubMed Central journal article supplement — J Stroke. 2024 May 30;26(2):280–9. doi: 10.5853/jos.2023.03713 (PMC11164589; doi:10.5853/jos.2023.03713), 2024-05-30
Supplement: jos-2023-03713-Supplementary-Fig-6.pdf [file jos-2023-03713-Supplementary-Fig-6.pdf]

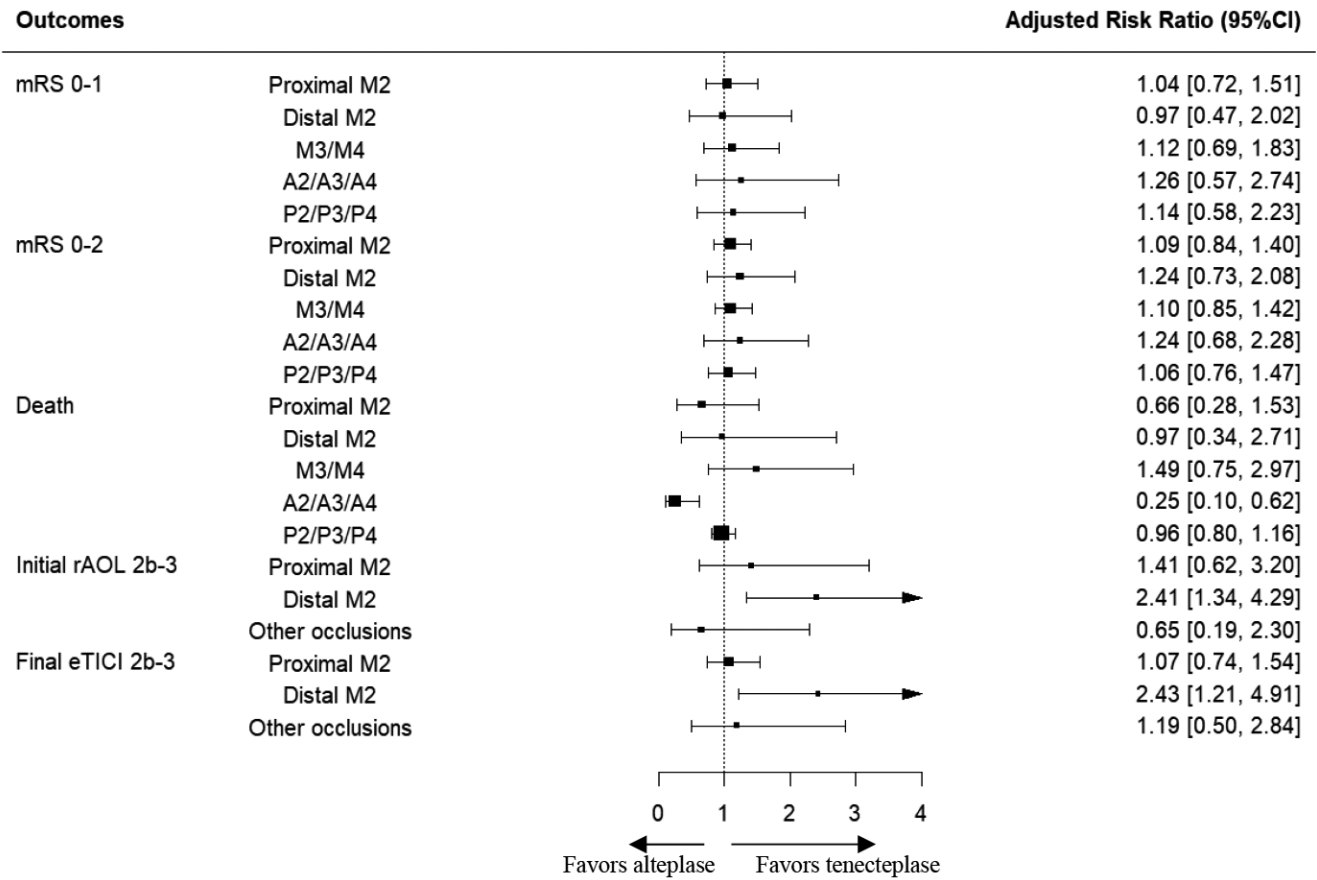

**Supplementary Figure 6.** Forest plot of adjusted risk ratio by treatment arm for the clinical and angiographic outcomes stratified by vessel occlusion site. Clinical outcomes (mRS 0–1 and mRS 0–2) were adjusted for age, sex, baseline stroke severity, stroke symptom onset-to-needle time as fixed-effects variables, and site as a random-effects variable. Angiographic outcomes were adjusted for age as fixed-effects variable, and site as a random-effects variable. *P* values for interaction were not significant for all outcomes (*P*>0.05). Adjusted risk ratio >1 is in favor of tenecteplase. For angiographic outcomes: occlusions other than M2-MCA were combined in one category because of the small numbers. mRS, modified Rankin Scale; MCA, middle cerebral artery; rAOL, revised arterial occlusion lesion score; eTICI, expanded Thrombolysis in Cerebral Infarction Score; CI, confidence interval.
